# Supplementary material for: Flavonoids from Mulberry Leaves Alleviate Lipid Dysmetabolism in High Fat Diet-Fed Mice: Involvement of Gut Microbiota
Source: PubMed Central journal article supplement (PMC7355566; doi:10.3390/microorganisms8060860), 2020-06-07
Supplement: microorganisms-08-00860-s001.pdf [file microorganisms-08-00860-s001.pdf]

**Supplementary Figure 1** The overall protocol used in this study.

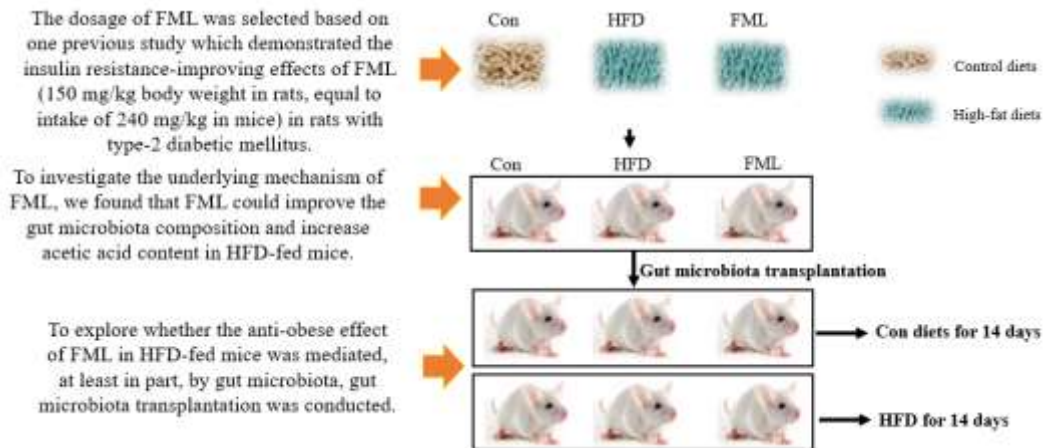

**Supplementary Figure 2** Schematic diagram of microbial transplantation.

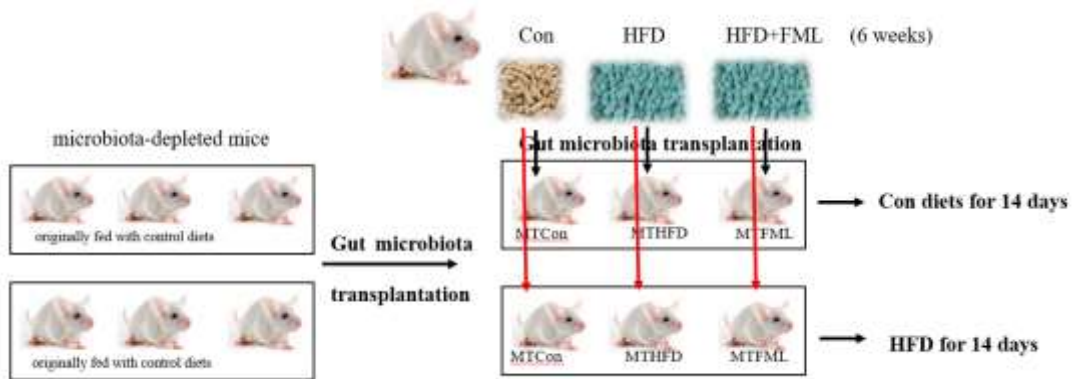

**Supplementary Table 1** Primers used in this study.

| Gene           | Nucleotide sequence (5-3') |
|----------------|----------------------------|
| SREBP1         | F:GAACGACATCGAAGACATGC     |
|                | R:GAGAAGCTCTCAGGAGAG       |
| SREBP2         | F:GTGCGCTCTCGTTTTACTGAAGT  |
|                | R:GTATAGAAGACGGCCTTCACCAA  |
| PPAR $\alpha$  | F:AGGCTGTAAGGGCTTCTTTTCG   |
|                | R:GGCATTTGTTCCGGTTCTTC     |
| PPAR $\gamma$  | F:CCATTCTGGCCCACCAAC       |
|                | R:AATGCGAGTGGTCTTCCATCA    |
| ACC            | F:TTCAGTTCATGCTGCCCAACA    |
|                | R:AGGTTGGAGGCAAAGGACAT     |
| LXR $\alpha$   | F:CTCAATGCCTGATGTTTCTCCT   |
|                | R:TCCAACCCTATCCCTAAAGCAA   |
| LXR $\beta$    | F:GATCCTCCTCCAGGCTCTGAA    |
|                | R:TGCGCTCAGGCTCATCCT       |
| $\beta$ -actin | F:GTCCACCTTCCAGCAGATGT     |
|                | R:GAAAGGGTGTAACACGCAGC     |

**Supplementary Table 2**

The quantification values of Glucose, TG, CHOL, HDL and LDL.

| Item            | Con               | HFD               | FML                | SEM  | p-value |
|-----------------|-------------------|-------------------|--------------------|------|---------|
| Glucose, mmol/L | 2.39 <sup>b</sup> | 4.04 <sup>a</sup> | 4.36 <sup>a</sup>  | 0.33 | <0.01   |
| TG, mmol/L      | 1.93 <sup>b</sup> | 2.23 <sup>a</sup> | 1.85 <sup>b</sup>  | 0.18 | 0.02    |
| CHOL, mmol/L    | 3.31 <sup>b</sup> | 4.69 <sup>a</sup> | 4.07 <sup>ab</sup> | 0.30 | <0.01   |
| HDL, mmol/L     | 2.68 <sup>c</sup> | 4.45 <sup>a</sup> | 3.56 <sup>ab</sup> | 0.30 | <0.01   |
| LDL, mmol/L     | 0.35              | 0.41              | 0.36               | 0.10 | 0.36    |

<sup>a,b,c</sup>Within a row, values with different superscripts differ significantly at  $P < 0.05$  and a trend toward

significance at  $P < 0.10$ . Data are expressed as means  $\pm$  SEM, n=7.

**Supplementary Table 3** Effects of FML on total reads and clean reads of microbiota.

| #Sample_name | Raw_reads(#) | Clean_Reads(#) | Base(nt) | AvgLen(nt) | Q20   | GC%   | Effective% |
|--------------|--------------|----------------|----------|------------|-------|-------|------------|
| Con1         | 85116        | 80095          | 32628985 | 407        | 80.7  | 53.44 | 94.1       |
| Con2         | 88355        | 80216          | 32887493 | 409        | 79.97 | 52.3  | 90.79      |
| Con3         | 79495        | 75923          | 31103293 | 409        | 78.71 | 52.31 | 95.51      |
| Con4         | 87134        | 80161          | 32544602 | 405        | 80.17 | 52.7  | 92         |
| Con5         | 82504        | 80187          | 32748416 | 408        | 80.25 | 53.12 | 97.19      |
| Con6         | 86698        | 80208          | 32682130 | 407        | 79.26 | 51.89 | 92.51      |
| Con7         | 88287        | 80154          | 32987932 | 411        | 79.57 | 53.07 | 90.79      |
| Con8         | 52286        | 50426          | 20587651 | 408        | 79.02 | 50.46 | 96.44      |
| HFD1         | 84206        | 80022          | 32784881 | 409        | 80.64 | 52.66 | 95.03      |
| HFD2         | 53401        | 50577          | 20698809 | 409        | 80.18 | 53.11 | 94.71      |
| HFD3         | 83091        | 80112          | 32265000 | 402        | 79.11 | 53.61 | 96.41      |
| HFD4         | 84467        | 80139          | 33137223 | 413        | 81.1  | 51.22 | 94.88      |
| HFD5         | 54029        | 51833          | 21668115 | 418        | 84.68 | 49.82 | 95.94      |
| HFD6         | 82175        | 80053          | 33563240 | 419        | 82.62 | 49.99 | 97.42      |
| HFD7         | 69809        | 65040          | 26763103 | 411        | 83    | 52.96 | 93.17      |
| HFD8         | 85902        | 80090          | 33096967 | 413        | 83.34 | 53.24 | 93.23      |
| FML1         | 53045        | 51569          | 21652221 | 419        | 83.91 | 50.26 | 97.22      |
| FML2         | 82240        | 80219          | 33479790 | 417        | 84.28 | 51.02 | 97.54      |
| FML3         | 88458        | 80096          | 33296765 | 415        | 81.93 | 51.09 | 90.55      |
| FML4         | 87368        | 80040          | 33197615 | 414        | 81.25 | 51.79 | 91.61      |
| FML5         | 87072        | 80122          | 33281835 | 415        | 81.13 | 51.58 | 92.02      |
| FML6         | 85995        | 80303          | 33010360 | 411        | 83.3  | 53.32 | 93.38      |
| FML7         | 87180        | 80070          | 33181692 | 414        | 83.6  | 52.6  | 91.84      |
| FML8         | 82446        | 80068          | 33083081 | 413        | 83.81 | 52.95 | 97.12      |

**Supplementary Table 4**

The quantification values of Glucose, TG, CHOL, HDL and LDL.

| Item            | Con               | HFD                | FML                | SEM  | P-value |
|-----------------|-------------------|--------------------|--------------------|------|---------|
| Glucose, mmol/L | 6.1 <sup>b</sup>  | 7.05 <sup>ab</sup> | 7.52 <sup>a</sup>  | 0.35 | 0.02    |
| TG, mmol/L      | 1.63 <sup>a</sup> | 1.26 <sup>b</sup>  | 1.57 <sup>ab</sup> | 0.21 | 0.09    |
| CHOL, mmol/L    | 3.20 <sup>b</sup> | 4.59 <sup>a</sup>  | 4.63 <sup>a</sup>  | 0.34 | <0.01   |
| HDL, mmol/L     | 2.66 <sup>b</sup> | 3.97 <sup>a</sup>  | 4.07 <sup>a</sup>  | 0.33 | <0.01   |
| LDL, mmol/L     | 0.48              | 0.54               | 0.50               | 0.12 | 0.59    |

<sup>a,b</sup> Within a row, values with different superscripts differ significantly at  $P < 0.05$  and a trend towardsignificance at  $P < 0.10$ . Data are expressed as means  $\pm$  SEM, n=7.

### Supplementary Table 5

The quantification values of Glucose, TG, CHOL, HDL and LDL.

| Item            | Con               | HFD               | FML                | SEM  | P-value |
|-----------------|-------------------|-------------------|--------------------|------|---------|
| Glucose, mmol/L | 6.30              | 6.80              | 6.33               | 0.37 | 0.54    |
| TG, mmol/L      | 0.98              | 1.11              | 1.02               | 0.16 | 0.39    |
| CHOL, mmol/L    | 3.55              | 4.09              | 3.41               | 0.32 | 0.2     |
| HDL, mmol/L     | 3.18              | 3.61              | 3.15               | 0.32 | 0.42    |
| LDL, mmol/L     | 0.32 <sup>b</sup> | 0.51 <sup>a</sup> | 0.37 <sup>ab</sup> | 0.15 | 0.07    |

<sup>a,b</sup> Within a row, values with different superscripts differ significantly at  $P < 0.05$  and a trend toward significance at  $P < 0.10$ . Data are expressed as means  $\pm$  SEM, n=7.

### Supplementary Table 6 The quantification values for SCFA.

| Item                             | Con                  | HFD                  | FML                   | SEM  | P-value |
|----------------------------------|----------------------|----------------------|-----------------------|------|---------|
| Acetic acid, $\mu\text{g/g}$     | 2219.85 <sup>a</sup> | 1776.49 <sup>b</sup> | 2100.22 <sup>ab</sup> | 6.24 | 0.04    |
| Propionate, $\mu\text{g/g}$      | 445.40 <sup>a</sup>  | 339.54 <sup>b</sup>  | 372.81 <sup>ab</sup>  | 3.00 | 0.03    |
| Isobutyric acid, $\mu\text{g/g}$ | 32.58                | 39.96                | 34.36                 | 0.98 | 0.20    |
| Butyrate, $\mu\text{g/g}$        | 283.12 <sup>a</sup>  | 251.63 <sup>ab</sup> | 220.60 <sup>b</sup>   | 2.25 | 0.03    |
| Isovaleric acid, $\mu\text{g/g}$ | 34.044 <sup>b</sup>  | 53.78 <sup>a</sup>   | 44.601 <sup>ab</sup>  | 1.33 | 0.05    |
| Valerate, $\mu\text{g/g}$        | 43.72 <sup>b</sup>   | 66.95 <sup>a</sup>   | 43.62 <sup>b</sup>    | 1.43 | 0.02    |

<sup>a,b</sup> Within a row, values with different superscripts differ significantly at  $P < 0.05$ . Data are presented as mean  $\pm$  SEM, n=9.
